# Supplementary material
Source: MDPI journal article supplement (https://www.mdpi.com/2073-4352/11/5/466)
Supplement: s1 [file s1]

## ELECTRONIC SUPPORTING INFORMATION

# Tuning transport phenomena in agarose gels for the control of protein nucleation density and crystal form

*Fiora Artusio<sup>1</sup>, Albert Castellví<sup>2</sup>, Roberto Pisano<sup>1</sup>,*

*José A. Gavira<sup>3\*</sup>*

<sup>1</sup> Department of Applied Science and Technology, Politecnico di Torino, 24 corso Duca degli Abruzzi, 10129 Torino, Italy; [fiora.artusio@polito.it](mailto:fiora.artusio@polito.it) (F.A.); [roberto.pisano@polito.it](mailto:roberto.pisano@polito.it) (R.P.)

<sup>2</sup> Molecular Biology Institute of Barcelona, Carrer Baldri Reixac 4-8 (Science Park), 08028 Barcelona, Spain; [acteri@ibmb.csic.es](mailto:acteri@ibmb.csic.es) (A.C.)

<sup>3</sup> Laboratorio de Estudios Cristalográficos, Instituto Andaluz de Ciencias de la Tierra (Consejo Superior de Investigaciones Científicas-Universidad de Granada), Avenida de las Palmeras 4, 18100 Armilla, Granada, Spain

\*Correspondence to: [jgavira@iact.ugr-csic.es](mailto:jgavira@iact.ugr-csic.es) (J.A.G.)

**Table S1.** The fitting parameters of the exponential law used to fit the experimental data of the nucleation density vs. agarose gel trend.  $A_N$  and  $B_N$  are the pre-exponential factors and the decay constants, respectively.

| Protein      | $A_N$ | STD error | $B_N$ | STD error |
|--------------|-------|-----------|-------|-----------|
| Proteinase K | 1.244 | 0.083     | 0.503 | 0.055     |
| HEWL         | 1.213 | 0.133     | 0.626 | 0.112     |
| Insulin      | 1.220 | 0.080     | 0.572 | 0.061     |

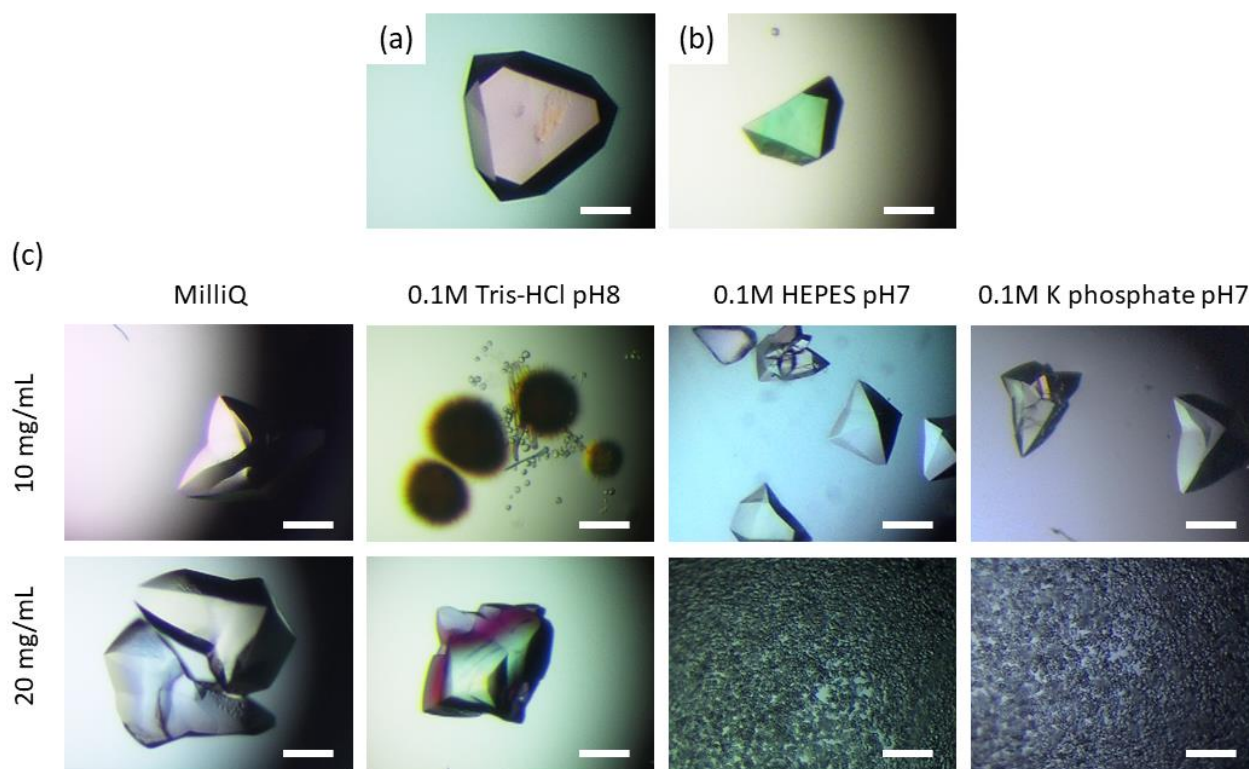

**Figure S1.** Proteinase K single crystals grown by HDVD crystallization method. (a) Proteinase K initial concentration was 15 mg/mL in 50 mM HEPES pH 7.0, and the precipitant solution consisted of 1 M  $\text{NaNO}_3$  and 50 mM Na citrate pH 6.5. (b) Proteinase K initial concentration was 20 mg/mL in 50 mM HEPES pH 7.0, the precipitation cocktail was 1.2 M  $(\text{NH}_4)_2\text{SO}_4$  in 0.1 M Tris-HCl pH 8.0. (c) Screening of proteinase K crystallization in presence of different buffers. Proteinase K concentration before mixing was 10 or 20 mg/mL. The protein to precipitant ratio was 1 for every condition. The scale bar correspond to 250  $\mu\text{m}$ .
